# Supplementary material
Source: PubMed Central journal article supplement (PMC3840147)
Supplement: NIHMS475158-supplement-1_si_001.pdf [file NIHMS475158-supplement-1_si_001.pdf]

## **SUPPORTING INFORMATION**

IDENTIFICATION AND CHARACTERIZATION OF A NEW CHEMOTYPE OF NON-COVALENT SENP INHIBITORS

Ikenna G. Madu, Andrew T. Namanja, Yang Su, Steven Wong, Yi-Jia Li and Yuan Chen\*

Department of Molecular Medicine, Beckman Research Institute of the City of Hope, 1500 East Duarte Road, Duarte, CA 91010.

## Supporting Information

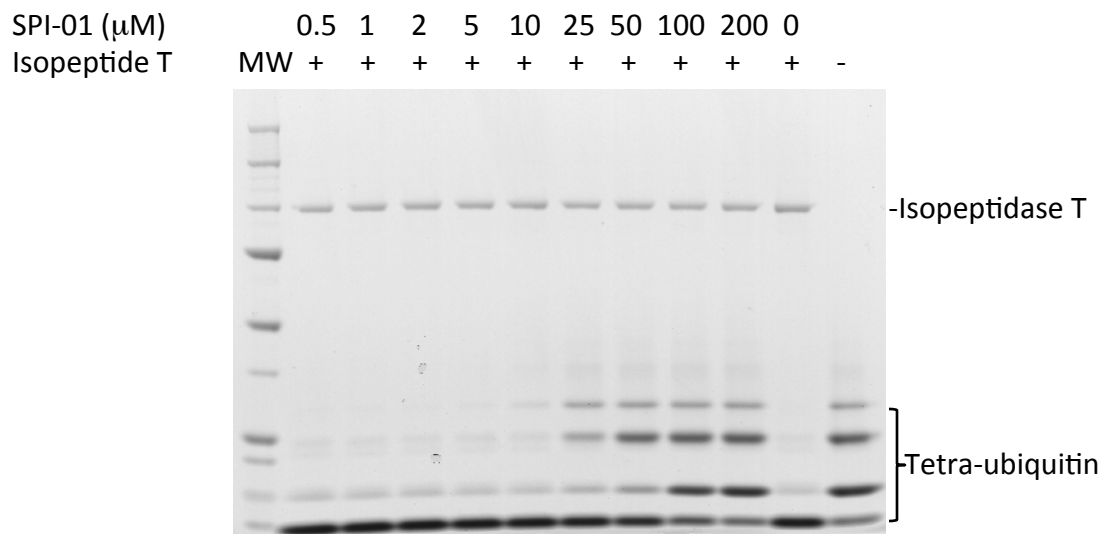

Figure S1. Isopeptidase T cleavage of tetra-ubiquitin. The concentration of Isopeptidase T was  $0.2 \mu\text{M}$  and tetra-ubiquitin was at  $0.4 \mu\text{g}/\mu\text{L}$  in a reaction volume of  $10 \mu\text{L}$ . Both enzyme and substrate were obtained from Boston Biochem, Inc. The  $\text{IC}_{50}$  for inhibition was approximately  $25 \mu\text{M}$ .

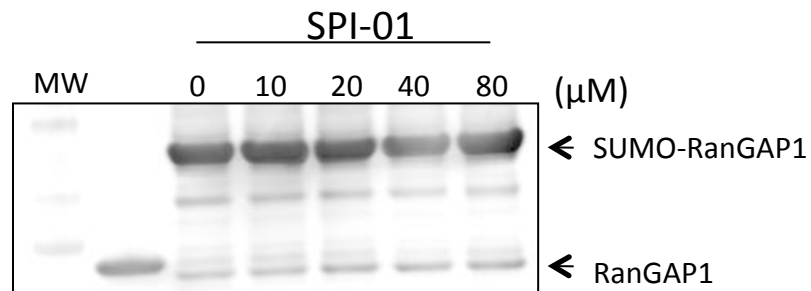

Figure S2. SPI-01 did not inhibit RanGAP1-SUMO conjugation reaction. The reaction mixture contained 0.05  $\mu\text{M}$  E1, 0.05  $\mu\text{M}$  Ubc9, 10  $\mu\text{M}$  RanGAP1 domain encompassing residues 418-587, 10  $\mu\text{M}$  mature SUMO1, and 2 mM ATP in 50 mM Tris buffer, pH 7.5. SPI-01 was added to and incubated with RanGAP1-SUMO conjugation reaction at the indicated concentrations. The reactions were held at 37°C for 20 min and the results were analyzed by SDS-PAGE.

Table S1. Assignments of the C-terminal residues of the SUMO-1 precursor

| Res  | HN    | NH      | CA     | CB     | CO      |
|------|-------|---------|--------|--------|---------|
| H98  | 8.149 | 119.397 | 56.254 | -      | -       |
| S99  | 8.007 | 125.368 | 57.511 | -      | 174.729 |
| T100 | 8.200 | 116.528 | 61.681 | 69.676 | 174.365 |
| V101 | 7.957 | 122.100 | 62.006 | 32.739 | 175.597 |
